# Supplementary material for: Construct validity and reliability of the Spanish version of the Undergraduate Nursing Student Academic Satisfaction Scale (UNSASS)
Source: Research Square preprint supplement (doi:10.21203/rs.3.rs-7155035/v1), 2025-07-28
Supplement: Supplementary file 1 [file 8718d0bf85a8eecfcccd3b40.docx]

**Supplementary Table 1. Bivariate analysis for the gender variable**

| **Variable** | **Gender** | **M [CI95%]1** | **SD2** | **U Mann Whitney**  **p-value**  **(biserial rank correlation)** | |
| --- | --- | --- | --- | --- | --- |
| **Female**  **(n = 186)** |
| **Male**  **(n = 40)** |
| Item 1. I can freely express my academic and other concerns to faculty members | Female | 3.23 [3.09-3.38] | 0.99 | 0.058  (0.183) | |
| Male | 3.55 [3.22-3.88] | 1.03 |
| Item 2. Faculty members are easily approachable | Female | 3.22 [3.08-3.35] | 0.91 | 0.464  (0.070) | |
| Male | 3.27 [3.00-3.55] | 0.84 |
| Item 3. Faculty members make every effort to assist students when asked | Female | 3.24 [3.11-3.37] | 0.89 | 0.678  (0.039) | |
| Male | 3.10 [2.75-3.45] | 1.10 |
| Item 4. Faculty members make an effort to understand difficulties I might be having with my course work | Female | 2.85 [2.73-2.98] | 0.84 | 0.292  (0.099) | |
| Male | 3.00 [2.70-3.30] | 0.93 |
| Item 5. I can freely express my academic and other concerns to the administration | Female | 3.34 [3.20-3.47] | 0.92 | 0.105  (0.153) | |
| Male | 3.63 [3.37-3.88] | 0.80 |
| Item 6. Faculty members are usually available after class and during office hours | Female | 3.24 [3.09-3.40] | 1.08 | 0.648  (0.044) | |
| Male | 3.35 [3.01-3.69] | 1.07 |
| Item 7. Faculty are fair and unbiased in their treatment of individual students | Female | 3.03 [2.88-3.18] | 1.05 | 0.527  (0.063) | |
| Male | 2.88 [2.49-3.26] | 1.20 |
| Item 8. Faculty members provide adequate feedback about students’ progress in a course | Female | 2.92 [2.78-3.06] | 0.95 | 0.023*****  (0.218) | |
| Male | 3.27 [3.01-3.54] | 0.81 |
| Item 9. I receive detailed feedback from faculty members on my work and written assignments | Female | 2.76 [2.61-2.90] | 1.01 | 0.102  (0.158) | |
| Male | 3.08 [2.75-3.40] | 1.02 |
| Item 10. Channels for expressing students’ complaints are readily available | Female | 2.73 [2.58-2.88] | 1.03 | 0.443  (0.075) | |
| Male | 2.60 [2.19-3.01] | 1.27 |
| Item11. Faculty members are good role models and motivate me to do my best | Female | 2.99 [2.85-3.13] | 0.95 | 0.925  (0.009) | |
| Male | 3.00 [2.68-3.32] | 1.01 |
| Item 12. The administration shows concern for students as individuals | Female | 2.45 [2.28-2.61] | 1.11 | 0.412  (0.080) | |
| Male | 2.40 [1.95-2.85] | 1.39 |
| Item 13. Faculty members demonstrate a high level of knowledge in their subject area | Female | 4.01 [3.87-4.14] | 0.90 | 0.666  (0.041) | |
| Male | 3.98 [3.72-4.23] | 0.80 |
| Item 14. Faculty members take the time to listen/discuss issues that may impact my academic performance | Female | 2.79 [2.65-2.93] | 0.96 | 0.233  (0.115) | |
| Male | 2.98 [2.67-3.28] | 0.94 |
| Item 15. Faculty members create a good overall impression | Female | 3.55 [3.42-3.68] | 0.90 | 0.963  (0.004) | |
| Male | 3.58 [3.33-3.82] | 0.78 |
| Item 16. I am generally given enough time to understand the things I have to learn | Female | 2.97 [2.83-3.12] | 0.98 | 0.002*****  (0.294) | |
| Male | 3.45 [3.19-3.71] | 0.81 |
| Item 17. Clinical instructors are approachable and make students feel comfortable about asking questions | Female | 3.73 [3.57-3.88] | 1.07 | 0.286  (0.103) | |
| Male | 3.98 [3.72-4.23] | 0.80 |
| Item 18. Clinical instructors provide feedback at appropriate times, and do not embarrass me in front of others (classmates, staff, patients and family members) | Female | 3.63 [3.48-3.78] | 1.04 | 0.687  (0.04) | |
| Male | 3.67 [3.30-4.05] | 1.18 |
| Item 19. Clinical instructors are open to discussions and difference in opinions | Female | 3.56 [3.41-3.71] | 1.03 | 0.086  (0.165) | |
| Male | 3.85 [3.51-4.19] | 1.07 |
| Item 20. Clinical instructors give me sufficient guidance before I perform technical skills | Female | 3.58 [3.42-3.73] | 1.05 | 0.091  (0.161) | |
| Male | 3.88 [3.59-4.16] | 0.88 |
| Item 21. Clinical instructors view my mistakes as part of my learning | Female | 3.65 [3.49-3.81] | 1.13 | 0.180  (0.128) | |
| Male | 3.90 [3.55-4.25] | 1.08 |
| Item 22. Clinical instructors give me clear ideas of what is expected from me during a clinical rotation | Female | 3.69 [3.53-3.85] | 1.10 | 0.280  (0.104) | |
| Male | 3.88 [3.52-4.23] | 1.11 |
| Item 23. Clinical instructors facilitate my ability to critically assess my client’s needs | Female | 3.58 [3.43-3.73] | 1.04 | 0.293  (0.101) | |
| Male | 3.75 [3.43-4.07] | 1.00 |
| Item 24. Clinical instructors assign me to patients that are appropriate for my level of competence | Female | 3.47 [3.30-3.64] | 1.18 | 0.120  (0.151) | |
| Male | 3.77 [3.43-4.12] | 1.07 |
| Item25. Clinical instructors give me verbal and written feedback concerning my clinical experience | Female | 3.64 [3.49-3.79] | 1.06 | 0.879  (0.015) | |
| Male | 3.67 [3.32-4.03] | 1.09 |
| Item 26. Clinical instructors demonstrate a high level of knowledge and clinical expertise | Female | 4.01 [3.87-4.15] | 0.95 | 0.680  (0.039) | |
| Male | 4.10 [3.82-4.38] | 0.87 |
| Item 27. Clinical instructors are available when needed | Female | 3.59 [3.45-3.73] | 0.97 | 0.980  (0.003) | |
| Male | 3.55 [3.19-3.91] | 1.13 |
| Item 28. Clinical instructors provide enough opportunities for independent practice in the lab and clinical sites | Female | 3.63 [3.48-3.78] | 1.01 | 0.427  (0.075) | |
| Male | 3.42 [3.03-3.82] | 1.23 |
| Item 29. Clinical instructors encourage me to link theory to practice | Female | 3.81 [3.68-3.93] | 0.87 | 0.706  (0.035) | |
| Male | 3.73 [3.44-4.01] | 0.90 |
| Item 30. Instructions are consistent among different clinical and lab instructors | Female | 3.35 [3.20-3.51] | 1.09 | 0.287  (0.103) | |
| Male | 3.20 [2.87-3.53] | 1.01 |
| Item 31. Faculty members behave professionally | Female | 3.95 [3.82-4.07] | 0.84 | 0.562  (0.053) | |
| Male | 3.85 [3.56-4.14] | 0.89 |
| Item 32. This program provides a variety of good and relevant courses | Female | 3.03 [2.89-3.16] | 0.95 | 0.991  (0.001) | |
| Male | 3.08 [2.82-3.33] | 0.79 |
| Item 33. The program enhances my analytical skills | Female | 3.32 [3.20-3.45] | 0.87 | 0.276  (0.103) | |
| Male | 3.17 [2.91-3.44] | 0.84 |
| Item 34. Most courses in this program are beneficial and contribute to my overall professional development | Female | 3.41 [3.29-3.53] | 0.84 | 0.411  (0.077) | |
| Male | 3.52 [3.31-3.74] | 0.67 |
| Item 35. The quality of instruction I receive in my classes is good and helpful | Female | 3.28 [3.16-3.40] | 0.85 | 0.778  (0.026) | |
| Male | 3.27 [3.03-3.52] | 0.75 |
| Item 36. I usually have a clear idea of what is expected of me in this program | Female | 3.39 [3.26-3.52] | 0.88 | 0.991  (0.001) | |
| Male | 3.45 [3.22-3.68] | 0.71 |
| Item 37. The program is designed to facilitate team work among students | Female | 3.44 [3.30-3.58] | 0.96 | 0.855  (0.017) | |
| Male | 3.42 [3.14-3.71] | 0.90 |
| Item 38. The program enhances my problem solving or critical thinking skills | Female | 3.32 [3.20-3.44] | 0.84 | 0.981  (0.002) | |
| Male | 3.27 [2.99-3.56] | 0.87 |
| Item 39. There is a commitment to academic excellence in this program | Female | 3.30 [3.16-3.43] | 0.92 | 0.568  (0.055) | |
| Male | 3.17 [2.84-3.51] | 1.05 |
| Item 40. As a result of my courses, I feel confident about dealing with clinical nursing problems | Female | 2.95 [2.80-3.10] | 1.04 | 0.069  (0.176) | |
| Male | 3.27 [2.99-3.56] | 0.90 |
| Item 41. Going to class helps me better understand the material | Female | 3.47 [3.31-3.64] | 1.14 | 0.871  (0.016) | |
| Male | 3.48 [3.06-3.89] | 1.30 |
| Item 42. I am able to experience intellectual growth in the program | Female | 3.61 [3.47-3.75] | 0.97 | 0.345  (0.089) | |
| Male | 3.48 [3.19-3.76] | 0.87 |
| Item 43. Overall, the program requirements are reasonable and achievable | Female | 3.54 [3.42-3.66] | 0.81 | 0.348  (0.086) | |
| Male | 3.45 [3.21-3.69] | 0.74 |
| Item 44. The secretaries are caring and helpful | Female | 2.94 [2.78-3.10] | 1.10 | 0.801  (0.025) | |
| Male | 2.95 [2.52-3.38] | 1.33 |
| Item 45. The secretaries behave professionally | Female | 3.59 [3.45-3.73] | 0.96 | 0.926  (0.009) | |
| Male | 3.60 [3.26-3.94] | 1.05 |
| Item 46. Support at the clinical and computer labs is readily available | Female | 2.94 [2.80-3.09] | 1.00 | 0.565  (0.056) | |
| Male | 3.02 [2.67-3.38] | 1.09 |
| Item 47. Computer and clinical labs are well equipped, adequately staffed, and are readily accessible to meet | Female | 2.82 [2.67-2.97] | 1.04 | 0.426  (0.008) | |
| Male | 2.67 [2.26-3.09] | 1.28 |
| Item 48. The facilities (class rooms, clinical and computer labs) facilitate my learning | Female | 3.23 [3.07-3.38] | 1.06 | 0.929  (0.009) | |
| Male | 3.27 [2.96-3.59] | 0.98 |
| Factor 1. Satisfaction with clinical teaching | Female | 54.86 [53.13-56.59] | 11.95 | 0.573  (0.057) | |
| Male | 56.20 [52.64-59.76] | 11.14 |
| Factor 2. Satisfaction with faculty and human resources | Female | 51.83 [50.21-53.45] | 11.18 | 0.253  (0.115) | |
| Male | 53.67 [50.75-56.60] | 9.13 |
| Factor 3. Satisfaction with the academic program and support resources | Female | 53.05 [51.61-54.50] | 9.97 | 0.700  (0.039) | |
| Male | 53.00 [50.56-55.44] | 7.62 |
| Total ESAEE | Female | 159.74 [155.63-163.85] | 28.39 | 0.542  (0.061) | |
| Male | 162.88 [156.11-169.64] | 21.15 |
| *1: Mean [Confident Inteval 95%]/ 2: Standard Deviation/ * Statistically significant p-value* | | | | |
