# Supplementary material for: Construct validity and reliability of the Spanish version of the Undergraduate Nursing Student Academic Satisfaction Scale (UNSASS)
Source: Research Square preprint supplement (doi:10.21203/rs.3.rs-7155035/v1), 2025-07-28
Supplement: Supplementary file 2 [file 9322cb1f4f6508822b94cae5.docx]

**Supplementary Table 3. Bivariate analysis for the Campus variable**

| **Variable** | **Campus** | **M [CI95%]4** | **SD5** | **Kruskal-Wallis**  **p-value**  **(Kelley's squared Epsilon)** | **Dwass-Steel-Critchlow-Fligner**  **p-value** | | |
| --- | --- | --- | --- | --- | --- | --- | --- |
| **GC1**  **(n = 167)** |
| **FTV2**  **(n = 38)** |
| **LNZ3**  **(n = 21)** |
| Item 1. I can freely express my academic and other concerns to faculty members | GC | 3.21 [3.06-3.36] | 0.98 | 0.139 (0.018) |  | | |
| FTV | 3.47 [3.123.83] | 1.08 |
| LNZ | 3.57 [3.08-4.06] | 1.08 |
| Item 2. Faculty members are easily approachable | GC | 3.08 [2.95-3.22] | 0.87 | <0.001***** (0.075) | GC-FTV <0.001 | | |
| FTV | 3.74 [3.46-4.01] | 0.83 |
| LNZ | 3.43 [3.01-3.85] | 0.93 |
| Item 3. Faculty members make every effort to assist students when asked | GC | 3.11 [2.97-3.26] | 0.95 | 0.014***** (0.038) | GC-FTV 0.016 | | |
| FTV | 3.55 [3.25-3.86] | 0.92 |
| LNZ | 3.38 [3.08-3.69] | 0.67 |
| Item 4. Faculty members make an effort to understand difficulties I might be having with my course work | GC | 2.80 [2.66-2.93] | 0.87 | 0.030***** (0.031) | GC-FTV 0.076  GC-LNZ 0.161  FTV-LNZ 0.991 | | |
| FTV | 3.11 [2.81-3.40] | 0.89 |
| LNZ | 3.14 [2.84-3.44] | 0.66 |
| Item 5. I can freely express my academic and other concerns to the administration | GC | 3.31 [3.16-3.45] | 0.92 | 0.123 (0.019) |  | | |
| FTV | 3.58 [3.29-3.87] | 0.89 |
| LNZ | 3.71 [3.36-4.07] | 0.78 |
| Item 6. Faculty members are usually available after class and during office hours | GC | 3.01 [2.86-3.16] | 0.98 | <0.001***** (0.192) | GC-FTV <0.001  GC-LNZ 0.037  FTV-LNZ 0.007 | | |
| FTV | 4.21 [3.88-4.55] | 1.02 |
| LNZ | 3.52 [3.10-3.95] | 0.93 |
| Item 7. Faculty are fair and unbiased in their treatment of individual students | GC | 3.04 [2.88-3.21] | 1.08 | 0.041***** (0.028) | FTV-LNZ 0.047 | | |
| FTV | 2.66 [2.31-3.01] | 1.07 |
| LNZ | 3.33 [2.89-3.77] | 0.97 |
| Item 8. Faculty members provide adequate feedback about students’ progress in a course | GC | 2.93 [2.79-3.08] | 0.94 | 0.309 (0.010) |  | | |
| FTV | 3.18 [2.87-3.50] | 0.96 |
| LNZ | 3.00 [2.59-3.41] | 0.89 |
| Item 9. I receive detailed feedback from faculty members on my work and written assignments | GC | 2.74 [2.59-2.90] | 1.01 | 0.198 (0.014) |  | | |
| FTV | 3.05 [2.72-3.39] | 1.01 |
| LNZ | 2.95 [2.44-3.46] | 1.12 |
| Item 10. Channels for expressing students’ complaints are readily available | GC | 2.66 [2.49-2.83] | 1.09 | 0.236 (0.013) |  | | |
| FTV | 2.71 [2.35-3.07] | 1.09 |
| LNZ | 3.10 [2.67-3.52] | 0.94 |
| Item11. Faculty members are good role models and motivate me to do my best | GC | 2.93 [2.79-3.08] | 0.96 | 0.046***** (0.027) | GC-FTV 0.043 | | |
| FTV | 3.29 [2.96-3.62] | 1.01 |
| LNZ | 2.90 [2.53-3.28] | 0.83 |
| Item 12. The administration shows concern for students as individuals | GC | 2.20 [2.05-2.36] | 1.03 | <0.001***** (0.123) | GC-FTV <0.001  FTV-LNZ 0.013 | | |
| FTV | 3.45 [3.00-3.89] | 1.35 |
| LNZ | 2.48 [2.08-2.87] | 0.87 |
| Item 13. Faculty members demonstrate a high level of knowledge in their subject area | GC | 3.97 [3.83-4.11] | 0.89 | 0.183 (0.015) |  | | |
| FTV | 4.16 [3.82-4.50] | 1.03 |
| LNZ | 3.95 [3.73-4.18] | 0.50 |
| Item 14. Faculty members take the time to listen/discuss issues that may impact my academic performance | GC | 2.68 [2.54-2.82] | 0.92 | <0.001***** (0.066) | GC-FTV 0.008  GC-LNZ 0.012 | | |
| FTV | 3.21 [2.87-3.55] | 1.04 |
| LNZ | 3.24 [2.86-3.62] | 0.83 |
| Item 15. Faculty members create a good overall impression | GC | 3.51 [3.37-3.64] | 0.88 | 0.261 (0.012) |  | | |
| FTV | 3.74 [3.43-4.04] | 0.92 |
| LNZ | 3.57 [3.20-3.94] | 0.81 |
| Item 16. I am generally given enough time to understand the things I have to learn | GC | 2.95 [2.81-3.10] | 0.94 | 0.006***** (0.045) | GC-FTV 0.005 | | |
| FTV | 3.47 [3.12-3.83] | 1.08 |
| LNZ | 3.14 [2.73-3.56] | 0.91 |
| Item 17. Clinical instructors are approachable and make students feel comfortable about asking questions | GC | 3.82 [3.66-3.98] | 1.02 | 0.201 (0.014) |  | | |
| FTV | 3.76 [3.43-4.10] | 1.03 |
| LNZ | 3.38 [2.87-3.89] | 1.12 |
| Item 18. Clinical instructors provide feedback at appropriate times, and do not embarrass me in front of others (classmates, staff, patients and family members) | GC | 3.68 [3.52-3.85] | 1.07 | 0.336 (0.010) |  | | |
| FTV | 3.58 [3.21-3.95] | 1.13 |
| LNZ | 3.38 [2.94-3.82] | 0.97 |
| Item 19. Clinical instructors are open to discussions and difference in opinions | GC | 3.60 [3.44-3.76] | 1.05 | 0.919 (0.001) |  | | |
| FTV | 3.71 [3.40-4.02] | 0.96 |
| LNZ | 3.52 [2.99-4.06] | 1.17 |
| Item 20. Clinical instructors give me sufficient guidance before I perform technical skills | GC | 3.66 [3.51-3.82] | 1.02 | 0.538 (0.006) |  | | |
| FTV | 3.55 [3.18-3.92] | 1.13 |
| LNZ | 3.48 [3.05-3.90] | 0.93 |
| Item 21. Clinical instructors view my mistakes as part of my learning | GC | 3.69 [3.52-3.86] | 1.11 | 0.251 (0.012) |  | | |
| FTV | 3.84 [3.43-4.25] | 1.24 |
| LNZ | 3.48 [3.01-3.95] | 1.03 |
| Item 22. Clinical instructors give me clear ideas of what is expected from me during a clinical rotation | GC | 3.76 [3.59-3.93] | 1.09 | 0.526 (0.006) |  | | |
| FTV | 3.68 [3.27-4.10] | 1.25 |
| LNZ | 3.52 [3.08-3.97] | 0.98 |
| Item 23. Clinical instructors facilitate my ability to critically assess my client’s needs | GC | 3.59 [3.43-3.74] | 1.02 | 0.121 (0.019) |  | | |
| FTV | 3.82 [3.43-4.20] | 1.16 |
| LNZ | 3.43 [2.98-3.87] | 0.98 |
| Item 24. Clinical instructors assign me to patients that are appropriate for my level of competence | GC | 3.46 [3.27-3.64] | 1.18 | 0.261 (0.012) |  | | |
| FTV | 3.74 [3.37-4.10] | 1.11 |
| LNZ | 3.71 [3.194.24] | 1.15 |
| Item25. Clinical instructors give me verbal and written feedback concerning my clinical experience | GC | 3.68 [3.52-3.84] | 1.04 | 0.115 (0.019) |  | | |
| FTV | 3.74 [3.35-4.12] | 1.18 |
| LNZ | 3.24 [2.79-3.69] | 1.00 |
| Item 26. Clinical instructors demonstrate a high level of knowledge and clinical expertise | GC | 4.01 [3.87-4.15] | 0.92 | 0.599 (0.005) |  | | |
| FTV | 4.00 [3.62-4.38] | 1.16 |
| LNZ | 4.24 [3.95-4.52] | 0.63 |
| Item 27. Clinical instructors are available when needed | GC | 3.63 [3.49-3.78] | 0.96 | 0.429 (0.008) |  | | |
| FTV | 3.37 [2.98-3.76] | 1.20 |
| LNZ | 3.52 [3.10-3.95] | 0.93 |
| Item 28. Clinical instructors provide enough opportunities for independent practice in the lab and clinical sites | GC | 3.61 [3.45-3.78] | 1.08 | 0.900 (0.001) |  | | |
| FTV | 3.53 [3.19-3.87] | 1.03 |
| LNZ | 3.57 [3.13-4.02] | 0.98 |
| Item 29. Clinical instructors encourage me to link theory to practice | GC | 3.78 [3.64-3.91] | 0.89 | 0.709 (0.003) |  | | |
| FTV | 3.92 [3.67-4.17] | 0.75 |
| LNZ | 3.67 [3.18-4.15] | 1.07 |
| Item 30. Instructions are consistent among different clinical and lab instructors | GC | 3.29 [3.12-3.45] | 1.07 | 0.334 (0.010) |  | | |
| FTV | 3.34 [2.97-3.72] | 1.15 |
| LNZ | 3.62 [3.15-4.08] | 1.02 |
| Item 31. Faculty members behave professionally | GC | 3.94 [3.81-4.07] | 0.86 | 0.642 (0.004) |  | | |
| FTV | 3.92 [3.59-4.25] | 1.00 |
| LNZ | 3.86 [3.60-4.12] | 0.57 |
| Item 32. This program provides a variety of good and relevant courses | GC | 2.96 [2.82-3.11] | 0.96 | 0.151 (0.017) |  | | |
| FTV | 3.21 [2.93-3.49] | 0.84 |
| LNZ | 3.29 [2.99-3.58] | 0.64 |
| Item 33. The program enhances my analytical skills | GC | 3.26 [3.13-3.40] | 0.88 | 0.613 (0.004) |  | | |
| FTV | 3.42 [3.13-3.71] | 0.89 |
| LNZ | 3.33 [3.00-3.67] | 0.73 |
| Item 34. Most courses in this program are beneficial and contribute to my overall professional development | GC | 3.44 [3.31-3.56] | 0.83 | 0.770 (0.002) |  | | |
| FTV | 3.45 [3.20-3.70] | 0.76 |
| LNZ | 3.33 [2.97-3.70] | 0.80 |
| Item 35. The quality of instruction I receive in my classes is good and helpful | GC | 3.29 [3.16-3.42] | 0.85 | 0.728 (0.003) |  | | |
| FTV | 3.26 [2.97-3.56] | 0.89 |
| LNZ | 3.19 [2.88-3.50] | 0.68 |
| Item 36. I usually have a clear idea of what is expected of me in this program | GC | 3.41 [3.28-3.54] | 0.85 | 0.097 (0.021) |  | | |
| FTV | 3.58 [3.32-3.84] | 0.79 |
| LNZ | 3.05 [2.60-3.49] | 0.97 |
| Item 37. The program is designed to facilitate team work among students | GC | 3.43 [3.28-3.57] | 0.97 | 0.229 (0.013) |  | | |
| FTV | 3.63 [3.37-3.89] | 0.79 |
| LNZ | 3.14 [2.64-3.65] | 1.11 |
| Item 38. The program enhances my problem solving or critical thinking skills | GC | 3.34 [3.20-3.47] | 0.88 | 0.426 (0.008) |  | | |
| FTV | 3.29 [3.05-3.53] | 0.73 |
| LNZ | 3.19 [2.85-3.53] | 0.75 |
| Item 39. There is a commitment to academic excellence in this program | GC | 3.26 [3.11-3.41] | 0.99 | 0.304 (0.011) |  | | |
| FTV | 3.42 [3.12-3.72] | 0.92 |
| LNZ | 3.14 [2.84-3.44] | 0.66 |
| Item 40. As a result of my courses, I feel confident about dealing with clinical nursing problems | GC | 3.01 [2.86-3.16] | 1.00 | 0.207 (0.014) |  | | |
| FTV | 3.18 [2.85-3.52] | 1.01 |
| LNZ | 2.67 [2.10-3.23] | 1.24 |
| Item 41. Going to class helps me better understand the material | GC | 3.38 [3.21-3.56] | 1.17 | 0.112 (0.019) |  | | |
| FTV | 3.71 [3.27-4.15] | 1.33 |
| LNZ | 3.76 [3.41-4.11] | 0.77 |
| Item 42. I am able to experience intellectual growth in the program | GC | 3.54 [3.40-3.69] | 0.97 | 0.378 (0.009) |  | | |
| FTV | 3.74 [3.39-4.08] | 1.06 |
| LNZ | 3.67 [3.40-3.93] | 0.58 |
| Item 43. Overall, the program requirements are reasonable and achievable | GC | 3.47 [3.35-3.60] | 0.83 | 0.171 (0.016) |  | | |
| FTV | 3.66 [3.39-3.93] | 0.82 |
| LNZ | 3.67 [3.40-3.93] | 0.58 |
| Item 44. The secretaries are caring and helpful | GC | 2.63 [2.48-2.79] | 1.00 | <0.001***** (0.269) | GC-FTV <0.001  FTV-LNZ <0.001 | | |
| FTV | 4.29 [4.04-4.54] | 0.77 |
| LNZ | 2.90 [2.43-3.38] | 1.04 |
| Item 45. The secretaries behave professionally | GC | 3.39 [3.25-3.53] | 0.94 | <0.001***** (0.192) | GC-FTV <0.001  FTV-LNZ <0.001 | | |
| FTV | 4.50 [4.29-4.71] | 0.65 |
| LNZ | 3.52 [3.15-3.89] | 0.81 |
| Item 46. Support at the clinical and computer labs is readily available | GC | 3.11 [2.96-3.27] | 0.99 | <0.001***** (0.091) | GC-FTV <0.001  FTV-LNZ 0.022 | | |
| FTV | 2.29 [1.95-2.63] | 1.04 |
| LNZ | 2.90 [2.59-3.22] | 0.70 |
| Item 47. Computer and clinical labs are well equipped, adequately staffed, and are readily accessible to meet | GC | 3.02 [2.86-3.18] | 1.04 | <0.001***** (0.127) | GC-FTV <0.001 | | |
| FTV | 1.97 [1.65-2.30] | 1.00 |
| LNZ | 2.52 [2.15-2.89] | 0.81 |
| Item 48. The facilities (class rooms, clinical and computer labs) facilitate my learning | GC | 3.40 [3.24-3.55] | 1.01 | <0.001***** (0.063) | GC-FTV 0.015  GC-LNZ 0.010 | | |
| FTV | 2.82 [2.44-3.19] | 1.14 |
| LNZ | 2.71 [2.33-3.10] | 0.85 |
| Factor 1. Satisfaction with clinical teaching | GC | 55.19 [53.4-56.98] | 11.71 | 0.690 (0.003) |  | | |
| FTV | 55.50 [51.29-59.71] | 12.80 |
| LNZ | 53.62 [48.55-58.69] | 11.14 |
| Factor 2. Satisfaction with faculty and human resources | GC | 50.20 [48.57-51.84] | 10.69 | <0.001***** (0.118) | GC-FTV <0.001 | | |
| FTV | 59.21 [56.22-62.20] | 9.11 |
| LNZ | 54.90 [50.63-59.18] | 9.40 |
| Factor 3. Satisfaction with the academic program and support resources | GC | 53.29 [51.78-54.81] | 9.91 | 0.393 (0.008) |  | | |
| FTV | 52.79 [49.56-56.01] | 9.81 |
| LNZ | 51.52 [48.73-54.32] | 6.15 |
| Total ESAEE | GC | 158.69 [154.45-162.93] | 27.73 | 0.063 (0.025) |  | | |
| FTV | 167.50 [158.68-176.32] | 26.84 |
| LNZ | 160.05 [149.74-170.35] | 22.64 |
| *1: GC: Gran Canaria/ 2: FTV: Fuerteventura/ 3: LNZ: Lanzarote/ 4: Mean [Confident Inteval 95%]/ 5: Standard Deviation/ * Statistically significant p-value* | | | | | |  |
