# Supplementary material for: Construct validity and reliability of the Spanish version of the Undergraduate Nursing Student Academic Satisfaction Scale (UNSASS)
Source: Research Square preprint supplement (doi:10.21203/rs.3.rs-7155035/v1), 2025-07-28
Supplement: Supplementary file 3 [file dcb62779a4eef2ba848c903d.docx]

**Supplementary Table 2. Bivariate analysis for the variable academic year**

| **Variable** | **Course** | **M [CI95%]1** | **SD2** | **U Mann Whitney**  **p-value**  **(biserial rank correlation)** |
| --- | --- | --- | --- | --- |
| **3rd year (n = 131)** |
| **4th year (n = 95)** |
| Item 1. I can freely express my academic and other concerns to faculty members | 3rd year | 3.24 [3.06 – 3.41] | 1.10 | 0.322  (0.074) |
| 4th year | 3.36 [3.15 – 3.56] | 1.05 |
| Item 2. Faculty members are easily approachable | 3rd year | 3.27 [3.12 – 3.43] | 1.01 | 0.233  (0.087) |
| 4th year | 3.16 [2.97 – 3.34] | 0.90 |
| Item 3. Faculty members make every effort to assist students when asked | 3rd year | 3.22 [3.05 – 3.39] | 1.22 | 0.756  (0.022) |
| 4th year | 3.20 [3.03 – 3.37] | 1.07 |
| Item 4. Faculty members make an effort to understand difficulties I might be having with my course work | 3rd year | 2.89 [2.73 – 3.06] | 0.93 | 0.572  (0.041) |
| 4th year | 2.86 [2.72 – 3.00] | 0.81 |
| Item 5. I can freely express my academic and other concerns to the administration | 3rd year | 3.37 [3.20 – 3.53] | 0.96 | 0.736  (0.024) |
| 4th year | 3.42 [3.24 – 3.60] | 0.95 |
| Item 6. Faculty members are usually available after class and during office hours | 3rd year | 3.28 [3.09 – 3.48] | 0.88 | 0.735  (0.025) |
| 4th year | 3.23 [3.02 – 3.44] | 0.87 |
| Item 7. Faculty are fair and unbiased in their treatment of individual students | 3rd year | 3.03 [2.84 – 3.22] | 1.02 | 0.701  (0.028) |
| 4th year | 2.97 [2.76 – 3.18] | 0.91 |
| Item 8. Faculty members provide adequate feedback about students’ progress in a course | 3rd year | 3.11 [2.95 – 3.27] | 1.06 | 0.021***** (0.170) |
| 4th year | 2.81 [2.62 – 3.00] | 1.00 |
| Item 9. I receive detailed feedback from faculty members on my work and written assignments | 3rd year | 2.91 [2.73 – 3.09] | 1.08 | 0.101  (0.123) |
| 4th year | 2.68 [2.48 – 2.89] | 1.05 |
| Item 10. Channels for expressing students’ complaints are readily available | 3rd year | 2.69 [2.50 – 2.88] | 1.04 | 0.805  (0.018) |
| 4th year | 2.74 [2.52 – 2.95] | 1.05 |
| Item11. Faculty members are good role models and motivate me to do my best | 3rd year | 2.97 [2.80 – 3.14] | 1.07 | 0.562  (0.042) |
| 4th year | 3.02 [2.84 – 3.20] | 0.98 |
| Item 12. The administration shows concern for students as individuals | 3rd year | 2.55 [2.34 – 2.76] | 1.17 | 0.105  (0.121) |
| 4th year | 2.28 [2.07 – 2.50] | 1.06 |
| Item 13. Faculty members demonstrate a high level of knowledge in their subject area | 3rd year | 4.08 [3.92 – 4.24] | 1.14 | 0.043***** (0.146) |
| 4th year | 3.89 [3.73 – 4.06] | 1.06 |
| Item 14. Faculty members take the time to listen/discuss issues that may impact my academic performance | 3rd year | 2.85 [2.68 – 3.01] | 1.05 | 0.655  (0.033) |
| 4th year | 2.79 [2.59 – 2.98] | 1.03 |
| Item 15. Faculty members create a good overall impression | 3rd year | 3.49 [3.34 – 3.64] | 1.18 | 0.108  (0.115) |
| 4th year | 3.64 [3.46 – 3.82] | 1.13 |
| Item 16. I am generally given enough time to understand the things I have to learn | 3rd year | 3.05 [2.87 – 3.22] | 1.07 | 0.860  (0.013) |
| 4th year | 3.07 [2.89 – 3.26] | 1.06 |
| Item 17. Clinical instructors are approachable and make students feel comfortable about asking questions | 3rd year | 3.71 [3.53 – 3.89] | 0.96 | 0.251  (0.085) |
| 4th year | 3.85 [3.65 – 4.06] | 0.91 |
| Item 18. Clinical instructors provide feedback at appropriate times, and do not embarrass me in front of others (classmates, staff, patients and family members) | 3rd year | 3.64 [3.45 – 3.83] | 1.01 | 0.920  (0.007) |
| 4th year | 3.63 [3.42 – 3.85] | 0.99 |
| Item 19. Clinical instructors are open to discussions and difference in opinions | 3rd year | 3.59 [3.41 – 3.77] | 1.04 | 0.707  (0.027) |
| 4th year | 3.64 [3.43 – 3.86] | 1.08 |
| Item 20. Clinical instructors give me sufficient guidance before I perform technical skills | 3rd year | 3.63 [3.44 – 3.81] | 0.81 | 0.870  (0.012) |
| 4th year | 3.63 [3.43 – 3.83] | 0.97 |
| Item 21. Clinical instructors view my mistakes as part of my learning | 3rd year | 3.67 [3.47 – 3.87] | 1.09 | 0.88  (0.011) |
| 4th year | 3.73 [3.51 – 3.94] | 1.07 |
| Item 22. Clinical instructors give me clear ideas of what is expected from me during a clinical rotation | 3rd year | 3.70 [3.50 – 3.90] | 0.84 | 0.797  (0.019) |
| 4th year | 3.76 [3.54 – 3.97] | 0.87 |
| Item 23. Clinical instructors facilitate my ability to critically assess my client’s needs | 3rd year | 3.61 [3.43 – 3.79] | 0.98 | 0.992  (0.000) |
| 4th year | 3.61 [3.40 – 3.82] | 0.84 |
| Item 24. Clinical instructors assign me to patients that are appropriate for my level of competence | 3rd year | 3.40 [3.20 – 3.61] | 0.92 | 0.040*****  (0.154) |
| 4th year | 3.69 [3.46 – 3.93] | 0.76 |
| Item25. Clinical instructors give me verbal and written feedback concerning my clinical experience | 3rd year | 3.69 [3.51 – 3.88] | 0.83 | 0.421  (0.060) |
| 4th year | 3.58 [3.36 – 3.79] | 0.79 |
| Item 26. Clinical instructors demonstrate a high level of knowledge and clinical expertise | 3rd year | 3.98 [3.82 – 4.15] | 0.85 | 0.452  (0.054) |
| 4th year | 4.08 [3.90 – 4.27] | 0.82 |
| Item 27. Clinical instructors are available when needed | 3rd year | 3.57 [3.40 – 3.75] | 0.91 | 0.844  (0.014) |
| 4th year | 3.59 [3.39 – 3.79] | 0.79 |
| Item 28. Clinical instructors provide enough opportunities for independent practice in the lab and clinical sites | 3rd year | 3.68 [3.50 – 3.86] | 0.89 | 0.176  (0.100) |
| 4th year | 3.47 [3.25 – 3.69] | 1.03 |
| Item 29. Clinical instructors encourage me to link theory to practice | 3rd year | 3.81 [3.67 – 3.95] | 0.84 | 0.845  (0.014) |
| 4th year | 3.77 [3.57 – 3.97] | 0.84 |
| Item 30. Instructions are consistent among different clinical and lab instructors | 3rd year | 3.32 [3.13 – 3.51] | 0.90 | 0.893  (0.010) |
| 4th year | 3.34 [3.12 – 3.55] | 0.98 |
| Item 31. Faculty members behave professionally | 3rd year | 3.85 [3.71 – 4.00] | 1.04 | 0.061  (0.132) |
| 4th year | 4.03 [3.85 – 4.21] | 1.01 |
| Item 32. This program provides a variety of good and relevant courses | 3rd year | 3.01 [2.84 – 3.18] | 1.16 | 0.874  (0.011) |
| 4th year | 3.07 [2.90 – 3.25] | 1.19 |
| Item 33. The program enhances my analytical skills | 3rd year | 3.43 [3.27 – 3.59] | 0.98 | 0.001*****  (0.234) |
| 4th year | 3.12 [2.96 – 3.27] | 0.94 |
| Item 34. Most courses in this program are beneficial and contribute to my overall professional development | 3rd year | 3.43 [3.28 – 3.57] | 0.83 | 0.842  (0.014) |
| 4th year | 3.43 [3.27 – 3.59] | 0.77 |
| Item 35. The quality of instruction I receive in my classes is good and helpful | 3rd year | 3.30 [3.15 – 3.44] | 1.18 | 0.733  (0.024) |
| 4th year | 3.25 [3.08 – 3.42] | 1.10 |
| Item 36. I usually have a clear idea of what is expected of me in this program | 3rd year | 3.38 [3.22 – 3.54] | 1.03 | 0.749  (0.023) |
| 4th year | 3.43 [3.27 – 3.59] | 0.91 |
| Item 37. The program is designed to facilitate team work among students | 3rd year | 3.53 [3.38 – 3.69] | 1.04 | 0.092  (0.123) |
| 4th year | 3.29 [3.08 – 3.50] | 0.99 |
| Item 38. The program enhances my problem solving or critical thinking skills | 3rd year | 3.38 [3.24 – 3.53] | 1.11 | 0.162  (0.101) |
| 4th year | 3.22 [3.05 – 3.39] | 1.05 |
| Item 39. There is a commitment to academic excellence in this program | 3rd year | 3.42 [3.26 – 3.58] | 1.06 | 0.004*****  (0.212) |
| 4th year | 3.07 [2.87 – 3.27] | 1.03 |
| Item 40. As a result of my courses, I feel confident about dealing with clinical nursing problems | 3rd year | 3.05 [2.87 – 3.23] | 12.21 | 0.676  (0.031) |
| 4th year | 2.96 [2.75 – 3.16] | 11.28 |
| Item 41. Going to class helps me better understand the material | 3rd year | 3.52 [3.32 – 3.72] | 11.61 | 0.484  (0.052) |
| 4th year | 3.41 [3.17 – 3.65] | 9.76 |
| Item 42. I am able to experience intellectual growth in the program | 3rd year | 3.57 [3.40 – 3.74] | 10.23 | 0.835  (0.015) |
| 4th year | 3.61 [3.42 – 3.80] | 8.59 |
| Item 43. Overall, the program requirements are reasonable and achievable | 3rd year | 3.47 [3.33 – 3.62] | 29.15 | 0.256  (0.080) |
| 4th year | 3.59 [3.43 – 3.75] | 24.46 |
| Item 44. The secretaries are caring and helpful | 3rd year | 2.99 [2.79 – 3.20] | 1.10 | 0.384  (0.065) |
| 4th year | 2.86 [2.64 – 3.09] | 1.05 |
| Item 45. The secretaries behave professionally | 3rd year | 3.59 [3.41 – 3.77] | 1.01 | 0.942  (0.005) |
| 4th year | 3.59 [3.41 – 3.77] | 0.90 |
| Item 46. Support at the clinical and computer labs is readily available | 3rd year | 3.03 [2.85 – 3.21] | 1.22 | 0.294  (0.078) |
| 4th year | 2.85 [2.65 – 3.05] | 1.07 |
| Item 47. Computer and clinical labs are well equipped, adequately staffed, and are readily accessible to meet | 3rd year | 2.90 [2.71 – 3.09] | 0.93 | 0.110  (0.120) |
| 4th year | 2.65 [2.44 – 2.87] | 0.81 |
| Item 48. The facilities (class rooms, clinical and computer labs) facilitate my learning | 3rd year | 3.28 [3.10 – 3.47] | 0.96 | 0.344  (0.070) |
| 4th year | 3.17 [2.96 – 3.38] | 0.95 |
| Factor 1. Satisfaction with clinical teaching | 3rd year | 54.87 [52.76 – 56.98] | 0.88 | 0.792  (0.020) |
| 4th year | 55.41 [53.11 – 57.71] | 0.87 |
| Factor 2. Satisfaction with faculty and human resources | 3rd year | 52.49 [50.48 – 54.50] | 1.02 | 0.648  (0.035) |
| 4th year | 51.69 [49.71 – 53.68] | 0.91 |
| Factor 3. Satisfaction with the academic program and support resources | 3rd year | 53.78 [52.01 – 55.55] | 1.06 | 0.049*****  (0.153) |
| 4th year | 52.03 [50.28 – 53.78] | 1.00 |
| Total ESAEE | 3rd year | 161.14 [156.10-166.18] | 1.08 | 0.349  (0.073) |
| 4th year | 159.14 [154.15-164.12] | 1.05 |
| *1: Mean [Confident Inteval 95%]/ 2: Standard Deviation/ * Statistically significant p-value* | | | | |
